# Supplementary material
Source: MDPI journal article supplement (https://www.mdpi.com/2073-4433/5/3/635)
Supplement: s1 [file s1]

## Sheet: total gaseous mercury
Station	Province	Longitude (°W)	Latitude (°N)	Start Date	End Date	Number of days with data	Total Gaseous Mercury (ng l-1)
							Mean	Standard deviation	50th percentile (median)	5th percentile	25th percentile	75th percentile	95th percentile
Little Fox Lake	YK	-135.633	61.35	2007-03-17	2011-10-27	1686	1.28	0.17	1.28	0.97	1.18	1.41	1.54
Reifel Island	BC	-123.17	49.1	1999-03-03	2004-02-11	1759	1.67	0.19	1.67	1.35	1.56	1.79	1.94
Saturna	BC	-123.133	48.783	2009-03-20	2010-12-20	641	1.43	0.2	1.42	1.11	1.29	1.57	1.73
Whistler	BC	-122.93	50.07	2008-08-28	2011-10-26	1086	1.21	0.2	1.19	0.93	1.05	1.36	1.57
Meadows	AB	-114.636	53.53	2005-05-05	2008-12-31	821	1.51	0.21	1.47	1.23	1.37	1.6	1.9
Genesee	AB	-114.202	53.3016	2004-03-18	2010-12-31	2442	1.53	0.25	1.5	1.23	1.38	1.64	1.99
Fort Chipewyan	AB	-111.117	58.777	2000-06-17	2001-07-19	398	1.36	0.15	1.35	1.13	1.28	1.47	1.6
Esther	AB	-110.2	51.6667	1998-06-26	2001-04-22	1032	1.65	0.15	1.65	1.4	1.54	1.75	1.9
Bratt's Lake	SK	-104.711	50.2011	2001-05-02	2010-12-31	3372	1.44	0.25	1.43	1.08	1.26	1.59	1.85
Flin Flon	MB	-101.875	54.765	2008-07-16	2010-12-31	734	3.75	2.22	3.39	1.71	2.33	4.75	8.39
Windsor	ON	-83.01	42.18	2007-01-02	2008-12-28	727	1.93	0.8	1.76	1.38	1.6	2.05	2.8
Burnt Island	ON	-82.95	45.8083	1998-04-30	2007-12-31	3533	1.55	0.22	1.56	1.19	1.4	1.7	1.9
Egbert	ON	-79.7833	44.2317	1996-11-30	2010-12-21	5135	1.58	0.29	1.58	1.14	1.4	1.74	2.02
Lake Ontario	ON	-79.45	43.4	2005-07-11	2005-09-24	76	1.71	0.2	1.66	1.48	1.57	1.79	2.06
Kuujjuarapik	PQ	-77.73	55.3	1999-08-24	2009-09-16	3677	1.68	0.46	1.63	1.09	1.44	1.86	2.32
Point Petre	ON	-77.1536	43.8428	1996-10-31	2007-12-31	4070	1.75	0.33	1.71	1.33	1.53	1.9	2.31
St. Anicet	PQ	-74.2833	45.1167	1994-08-26	2009-12-31	5607	1.6	0.37	1.56	1.2	1.4	1.75	2.12
St. Andrews	NB	-67.0833	45.0833	1996-01-01	2007-07-29	3937	1.38	0.24	1.37	1	1.23	1.53	1.78
Kejimkujik	NS	-65.2056	44.4328	1996-01-01	2010-12-31	5480	1.4	0.31	1.39	1	1.23	1.54	1.78
Mingan	PQ	-64.1667	50.2667	1997-01-01	2000-12-31	1461	1.57	0.19	1.58	1.24	1.44	1.72	1.84
Southampton	PE	-62.5812	46.3875	2005-01-01	2006-12-31	731	1.23	0.19	1.22	0.94	1.1	1.37	1.53
Alert	NU	-62.3333	82.5	1995-01-01	2011-12-28	6196	1.51	0.37	1.54	0.76	1.38	1.7	2.06

## Sheet: speciated mercury
Station	Province	Longitude (°W)	Latitude (°N)	Start Date	End Date	Number of days with data	Mean	Standard deviation	Median (50th percentile)	5th percentile	25th percentile	75th percentile	95th percentile
							gaseous elemental mercury (GEM), ng m-3
Genesee	AB	-114.202	53.3016	2009-01-23	2009-09-16	221	1.40414	0.154027	1.41836	1.15498	1.28525	1.5088	1.63781
Flin Flon	MB	-101.875	54.765	2010-07-20	2011-05-07	211	2.05517	0.580243	1.86667	1.62377	1.77309	2.08967	3.04843
Churchill	MB	-94.067	58.75	2004-03-22	2004-08-12	130	1.51553	0.492472	1.70775	0.413609	1.22067	1.8813	2.03965
ELA	ON	-93.7211	49.6639	2005-05-17	2010-12-31	1373	1.39165	0.238018	1.37061	1.03995	1.23266	1.53111	1.79304
Mississauga	ON	-79.6514	43.5355	2009-01-01	2009-12-17	248	1.39997	0.204421	1.41302	1.06007	1.25821	1.52985	1.74567
Dorset	ON	-78.9311	45.2239	2008-07-15	2010-03-31	434	1.38447	0.341403	1.35619	0.870171	1.08498	1.67837	1.89576
St Anicet	PQ	-74.2833	45.1167	2003-01-01	2010-12-31	1677	1.52381	0.281499	1.51251	1.15066	1.34354	1.66443	1.97542
Kejimkujik	NS	-65.2058	44.4336	2009-01-25	2010-12-27	559	1.33786	0.202791	1.3644	1.01415	1.18838	1.47322	1.5702
Halifax	NS	-63.6667	44.6667	2009-09-30	2010-12-31	435	1.67678	0.436226	1.65101	1.34048	1.53426	1.7565	2.01667
Alert	NU	-62.3333	82.5	2002-01-04	2011-12-05	2630	1.26254	0.394016	1.29758	0.470965	1.10852	1.4766	1.87526
							reactive gaseous mercury (RGM), pg m-3
Genesee	AB	-114.202	53.3016	2009-01-23	2009-09-16	221	5.03273	4.96563	3.0801	0.428223	1.30632	7.20625	14.3676
Flin Flon	MB	-101.875	54.765	2010-07-20	2011-05-07	211	3.36028	3.01305	2.34495	0.447285	1.03475	4.96493	10.6021
Churchill	MB	-94.067	58.75	2004-03-22	2004-08-12	130	100.888	141.403	28.8343	1.21217	6.74033	139.01	385.866
ELA	ON	-93.7211	49.6639	2005-05-17	2010-12-31	1373	1.01812	1.97835	0.343447	0	0.0895828	1.03073	4.24815
Mississauga	ON	-79.6514	43.5355	2009-01-01	2009-12-17	248	3.70903	6.56277	1.66096	0	0.202267	3.73631	16.0984
Dorset	ON	-78.9311	45.2239	2008-07-15	2010-03-31	434	2.67063	2.88579	1.68802	0.252767	0.904595	3.39653	8.92836
St Anicet	PQ	-74.2833	45.1167	2003-01-01	2010-12-31	1677	2.99934	4.70456	1.62891	0.0521	0.633785	3.48946	10.0327
Kejimkujik	NS	-65.2058	44.4336	2009-01-25	2010-12-27	559	0.507646	0.756805	0.244691	0	0.0703333	0.580607	2.03934
Halifax	NS	-63.6667	44.6667	2009-09-30	2010-12-31	435	2.1408	2.26464	1.43559	0.270375	0.753453	2.58257	7.03195
Alert	NU	-62.3333	82.5	2002-01-04	2011-12-05	2630	21.7772	47.1312	3.18986	0.173655	1.07075	15.2501	126.152
							total particulate mercury <2.5 microns (TPM2.5), pg m-3
Genesee	AB	-114.202	53.3016	2009-01-23	2009-09-16	221	4.50693	5.02935	3.71267	1.13284	2.3411	5.16949	8.65078
Flin Flon	MB	-101.875	54.765	2010-07-20	2011-05-07	211	10.374	13.4024	5.64686	1.05918	2.27171	11.9321	35.0464
Churchill	MB	-94.067	58.75	2004-03-22	2004-08-12	130	168.53	349.243	16.9053	1.11201	3.42572	143.289	914.278
ELA	ON	-93.7211	49.6639	2005-05-17	2010-12-31	1373	4.42152	7.57473	3.08353	0.594772	1.60462	5.25247	10.1872
Mississauga	ON	-79.6514	43.5355	2009-01-01	2009-12-17	248	6.47227	5.2548	4.96183	0.58125	2.89762	8.5816	17.7821
Dorset	ON	-78.9311	45.2239	2008-07-15	2010-03-31	434	5.86387	6.59944	3.4809	0.687529	1.90033	7.96164	17.9925
St Anicet	PQ	-74.2833	45.1167	2003-01-01	2010-12-31	1677	17.5297	29.5627	8.38049	0.6115	3.89451	19.6132	64.4409
Kejimkujik	NS	-65.2058	44.4336	2009-01-25	2010-12-27	559	4.20607	7.74899	2.11025	0.23362	0.932625	3.85979	17.6112
Halifax	NS	-63.6667	44.6667	2009-09-30	2010-12-31	435	2.34291	1.68916	1.95146	0.36705	1.1733	3.1675	5.52704
Alert	NU	-62.3333	82.5	2002-01-04	2011-12-05	2630	41.057	78.9739	11.3014	0.762446	4.49675	34.6312	225.882

## Sheet: Hg in precipitation
Station	Province	Longitude (°W)	Latitude (°N)	Start Date	End Date	Mean Monthly Precip (mm)	Hg deposited (μg m-2 month-1)						Concentration of total Hg (ng l-1)
							Mean	Median (50th percentile)	5th percentile	25th percentile	75th percentile	95th percentile	Mean (volume-weighted)	Median (50th percentile)	5th percentile	25th percentile	75th percentile	95th percentile	Minimum	Maximum
Reifel Island	BC	-123.17	49.1	2000-03-28	2004-02-03	67.8525	0.382	0.3535	0.094	0.193	0.553	0.771	5.63	4.79	2.05	2.9	7.37	12.97	1.75	20.26
Saturna Island	BC	-123.128	48.7753	2009-08-01	2011-02-01	90.8934	0.41	0.398	0.014	0.282	0.532	0.765	4.51	3.84	1.52	2.3	4.72	13.17	1.52	25.04
Fort Vermillion	AB	-116.02	58.38	2006-12-13	2008-01-17	21.9993	0.103	0.062	0.007	0.025	0.197	0.378	4.29	2.67	0.83	1.86	8.02	8.94	0.83	8.94
Genesee	AB	-114.202	53.3016	2006-07-25	2011-02-01	32.3885	0.443	0.2185	0.024	0.074	0.617	1.84	12.79	11.69	2.57	5.51	16.23	31.32	1.37	68.16
Crossfield	AB	-114.003	51.2924	2006-05-30	2007-12-24	23.3803	0.217	0.059	0	0.011	0.471	0.993	9.31	8.56	3.03	8.53	9.5	14.68	3.03	31.3
Henry Kroeger	AB	-110.832	51.4242	2004-09-28	2011-02-01	24.7577	0.353	0.176	0.005	0.036	0.633	1.089	11.66	10.72	3.52	7.41	14.92	22.26	1.41	61.06
Esther	AB	-110.2	51.6667	2000-02-01	2001-06-01	13.9111	0.21	0.113	0.013	0.044	0.234	0.76	14.16	12.25	2.57	12.19	12.75	55.85	2.57	55.85
Bratt's Lake	SK	-104.711	50.2003	2001-05-31	2011-02-01	26.1896	0.372	0.312	0.011	0.088	0.492	0.948	11.19	9.98	5	7.41	12.24	21.99	1.71	54.48
Flin Flon	MB	-101.875	54.765	2009-09-20	2010-12-05	30.0991	1.804	0.9585	0.129	0.2295	3.4025	5.118	59.92	44.06	30	44.06	58.17	214.91	25.5	214.91
Churchill	MB	-94.067	58.75	2006-06-20	2007-12-27	15.3131	0.112	0.05	0.004	0.026	0.125	0.465	5.28	4.28	3.23	4.28	5.96	11.62	2.89	11.62
ELA	ON	-93.7328	49.6642	2009-11-24	2011-01-04	69.2839	0.766	0.544	0.052	0.14	1.236	2.261	9.61	9.74	3.79	6.54	11.21	17.3	1.89	17.3
Burnt Island	ON	-82.95	45.8083	2001-11-27	2003-04-01	60.6535	0.557	0.4175	0.107	0.2085	0.8435	1.325	9.18	8.36	2.59	6.21	14.17	15.2	2.59	15.2
Egbert	ON	-79.7917	44.2339	2000-02-01	2011-02-01	56.5295	0.473	0.383	0.094	0.199	0.646	1.008	8.37	8	3.02	4.84	10.99	16.66	1.85	22.88
Dorset	ON	-78.9311	45.2239	1997-01-28	1999-01-01	56.4586	0.548	0.549	0.167	0.273	0.734	1.183	9.71	8.2	3.26	5.21	11.84	22.58	3.26	24.94
Point Petre	ON	-77.1536	43.8428	2001-09-01	2003-04-01	58.3661	0.538	0.384	0.135	0.306	0.64	2.049	9.05	7.37	5.34	6.14	11.02	17.11	5.16	17.11
Chapais	PQ	-74.9753	49.8225	2009-11-01	2011-02-01	70.8841	0.456	0.2785	0.079	0.107	1.019	1.053	6.43	7.05	1.59	2.51	8.36	12.7	1.59	29.97
St. Anicet	PQ	-74.0333	45.2	1998-04-28	2007-09-04	70.2161	0.557	0.5005	0.122	0.2985	0.783	1.197	7.93	7.41	4.1	6.06	9.52	12.86	3.19	24.07
St. Andrews	NB	-67.0833	45.0833	1996-06-01	2003-12-02	85.6018	0.563	0.47	0.173	0.313	0.676	1.161	6.57	5.23	2.68	4.05	8.3	14.22	2.11	21.06
Kejimkujik	NS	-65.2056	44.4328	1996-06-01	2011-02-01	110.991	0.58	0.532	0.21	0.374	0.746	1.053	5.23	4.28	2.38	3.28	6.53	10.75	1.94	29.46
Mingan	PQ	-64.2333	50.2667	1998-04-28	2007-09-04	77.2322	0.389	0.334	0.08	0.188	0.5635	0.962	5.04	4.47	2.01	3.07	6.32	9.05	1.77	16.91
Stephenville	NF	-58.5656	48.5614	2010-02-23	2011-02-01	96.9497	0.543	0.446	0.148	0.193	0.715	1.704	5.6	4.29	2.12	3.43	6.48	15.44	2.12	15.44
Cormak	NF	-57.3931	49.3214	2000-05-25	2010-07-05	94.082	0.395	0.3315	0.106	0.205	0.523	0.859	4.2	3.75	1.86	2.65	5.35	8.34	1.44	12.48
